# Supplementary material for: Alleviating Elderly Loneliness in Hollowed Villages: A Therapeutic Landscape Approach Integrating Space Syntax and Psychosocial Surveys
Source: Research Square preprint supplement (doi:10.21203/rs.3.rs-8169531/v1), 2026-02-16
Supplement: Supplementary file 1 [file 059a99db934ba785ae4692b8.docx]

**Author contributions:**

Ling Zhang (Joint Supervisor): Conceptualization (lead), Supervision (lead), Writing – Review & Editing (lead)

Xiaoyi Zheng: Investigation (lead), Formal Analysis (lead), Methodology (lead), Writing – Original Draft (lead)

Huan Wang: Investigation (supporting), Formal Analysis (lead), Writing – Original Draft (supporting)

Ming Li (Corresponding Author): Correspondence, Resources (supporting)

These authors (Ling Zhang, Ming Li) jointly supervised this work.

**Competing interests：**

The author(s) declare no competing interests.

**Data availability：**

All data generated or analysed during this study are included in this published article [and its supplementary information files].

**Ethics statements：**

This study was approved by the Institutional Review Board (IRB) of China University of Mining and Technology. The scope of this approval covered all aspects of the study, including the recruitment of participants, data collection through psychosocial surveys, and data analysis.

**Informed consent：**

The study involves non-interventional research (e.g., surveys, questionnaires, interview analysis, or similar). All participants have been fully informed that their anonymity is assured, the purpose of the research, how their data will be used, and any potential risks associated with their participation.
